# Supplementary material for: Small Sized Yet Powerful: Nuclear Distribution C Proteins in Plants
Source: MDPI journal article supplement (doi:10.3390/plants13010119), 2023-12-31
Supplement: s1 [file s1]

# Conserved domains on selected NudC proteins

*Arabidopsis thaliana*

BOB1 (At5g53400.1)

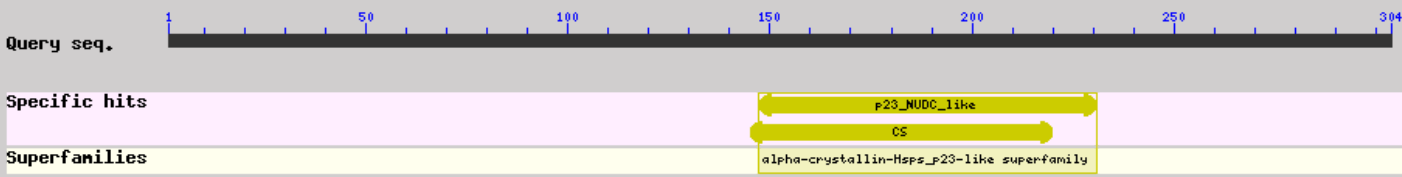

NMig1 (At5g58740.1)

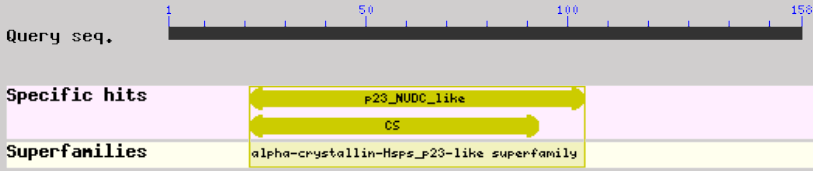

*Solanum lycopersicum*

Solyc06g076940

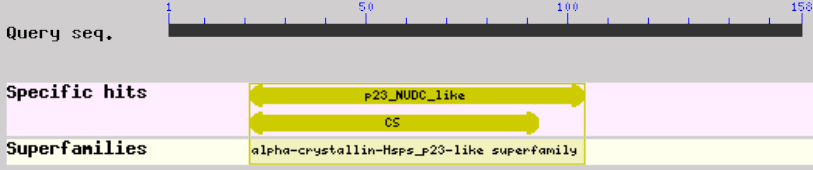

Solyc02g062410

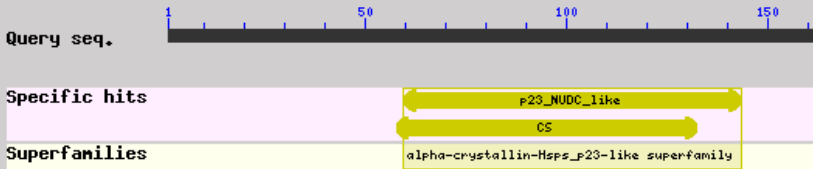

*Glycine max*

GLYMA\_11G17550

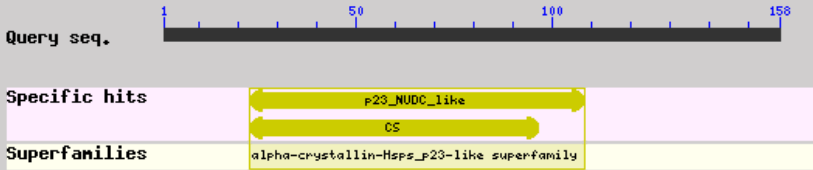

GLYMA\_06G12800

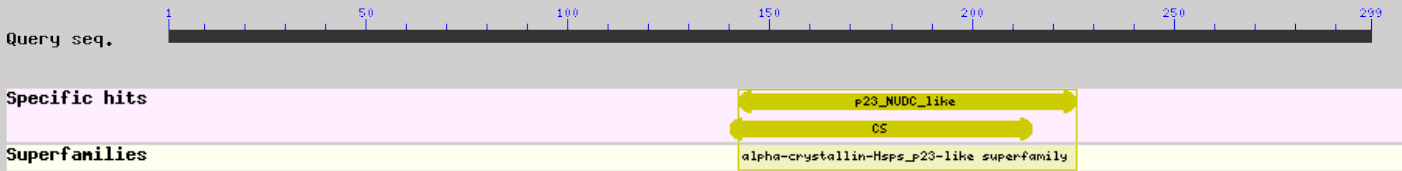

*Helianthus annuus*

HanXRQr2\_Ch07

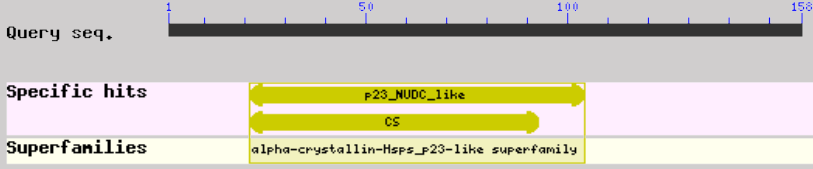

HanXRQr2\_Ch09g0404081

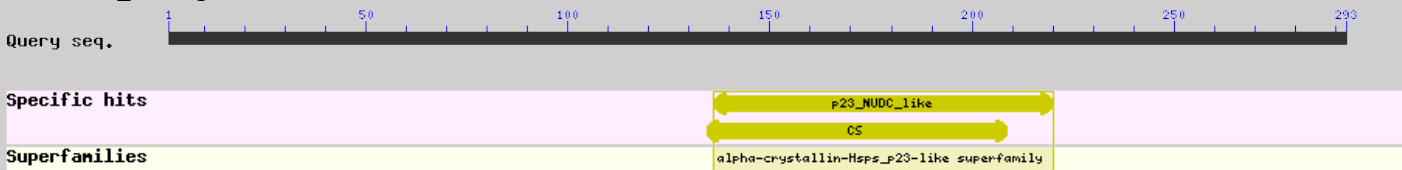

*Prunus persica*

PRUPE\_6G057600

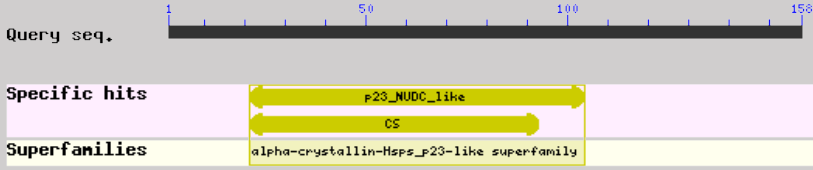

PRUPE\_2G310800

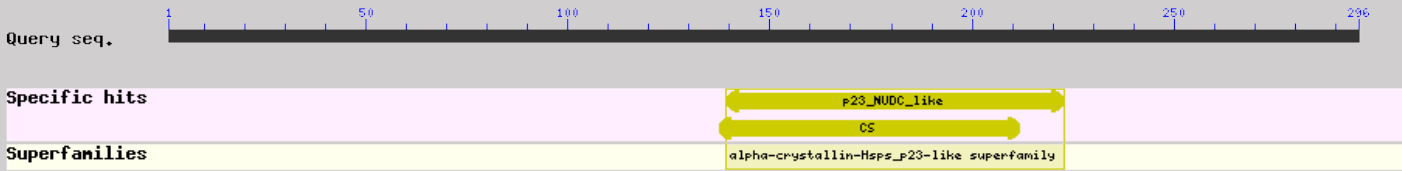

*Oryza sativa*

Os01t0668000

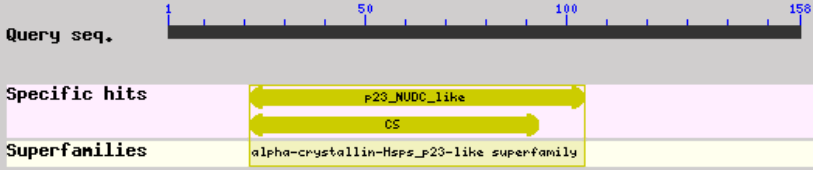

Os06t0231300

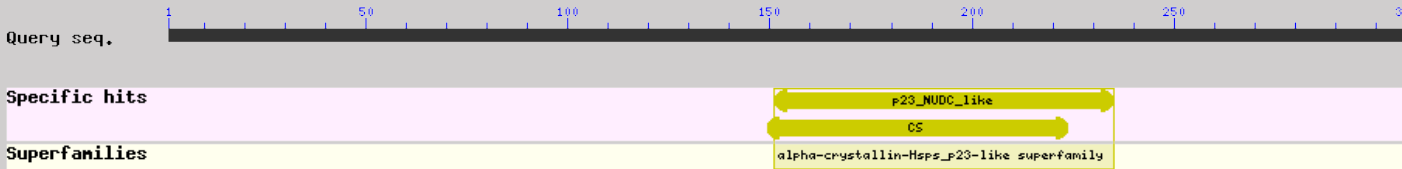

*Zea mays*

Zm00001eb11060

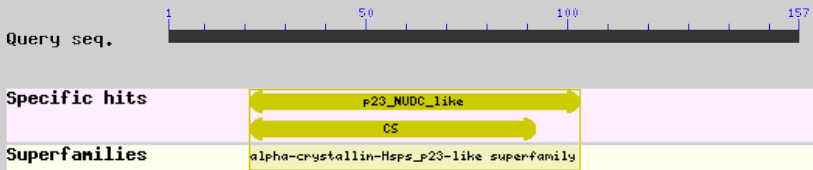

Zm00001d015423

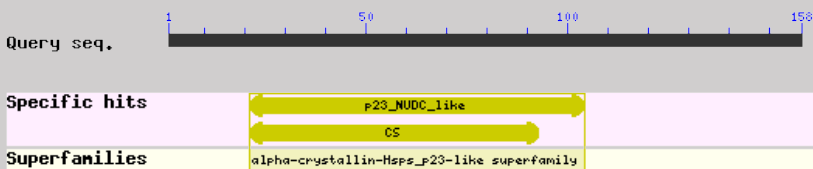

Amborella trichpoda

AMTR\_s00029p00

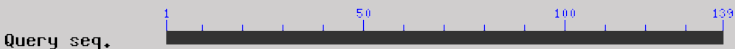

|               |                                                                                |
|---------------|--------------------------------------------------------------------------------|
| Specific hits | <div><div>p23_NUDC_like</div></div>                                            |
| Superfamilies | <div><div>CS</div></div> <div>alpha-crystallin-Hsps_p23-like superfamily</div> |

AMTR\_s00017p00

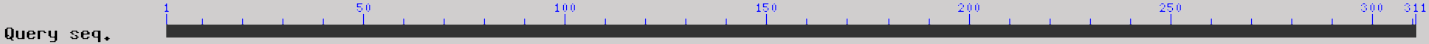

|               |                                                                                |
|---------------|--------------------------------------------------------------------------------|
| Specific hits | <div><div>p23_NUDC_like</div></div>                                            |
| Superfamilies | <div><div>CS</div></div> <div>alpha-crystallin-Hsps_p23-like superfamily</div> |

Selaginella moellendorffii

SELMODRAFT\_121

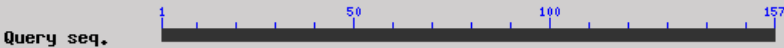

|               |                                                                                |
|---------------|--------------------------------------------------------------------------------|
| Specific hits | <div><div>p23_NUDC_like</div></div>                                            |
| Superfamilies | <div><div>CS</div></div> <div>alpha-crystallin-Hsps_p23-like superfamily</div> |

SELMODRAFT\_115

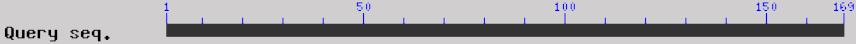

|               |                                                                                |
|---------------|--------------------------------------------------------------------------------|
| Specific hits | <div><div>p23_NUDC_like</div></div>                                            |
| Superfamilies | <div><div>CS</div></div> <div>alpha-crystallin-Hsps_p23-like superfamily</div> |

Physcomitrella patens

PHYPA\_020249

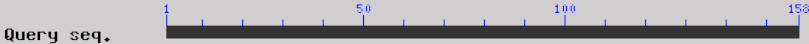

|               |                                                                                |
|---------------|--------------------------------------------------------------------------------|
| Specific hits | <div><div>p23_NUDC_like</div></div>                                            |
| Superfamilies | <div><div>CS</div></div> <div>alpha-crystallin-Hsps_p23-like superfamily</div> |

PHYPA\_029156

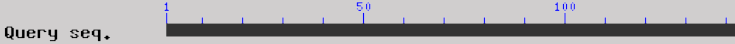

|                   |                                                                  |
|-------------------|------------------------------------------------------------------|
| Specific hits     | <div><div>p23_NUDC_like</div></div>                              |
| Non-specific hits | <div><div>CS</div></div>                                         |
| Superfamilies     | <div><div>alpha-crystallin-Hsps_p23-like superfamily</div></div> |

Marchantia polymorpha

MARPO\_0037s004

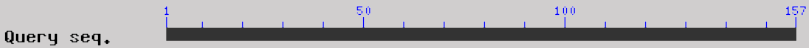

|               |                                                                                |
|---------------|--------------------------------------------------------------------------------|
| Specific hits | <div><div>p23_NUDC_like</div></div>                                            |
| Superfamilies | <div><div>CS</div></div> <div>alpha-crystallin-Hsps_p23-like superfamily</div> |

MARPO\_0030s006

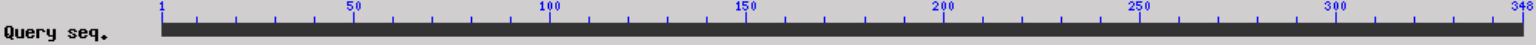

|                   |                                                                                              |
|-------------------|----------------------------------------------------------------------------------------------|
| Specific hits     | <div><div>p23_NUDC_like</div></div>                                                          |
| Non-specific hits | <div><div>Nudc_N</div></div>                                                                 |
| Superfamilies     | <div><div>Nudc_N superfami</div></div> <div>alpha-crystallin-Hsps_p23-like superfamily</div> |

Klebsormidium nitens

KFL\_003070120

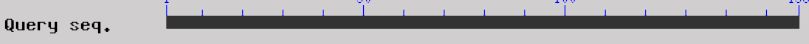

|               |                                                                                |
|---------------|--------------------------------------------------------------------------------|
| Specific hits | <div><div>p23_NUDC_like</div></div>                                            |
| Superfamilies | <div><div>CS</div></div> <div>alpha-crystallin-Hsps_p23-like superfamily</div> |

KFL\_002820210

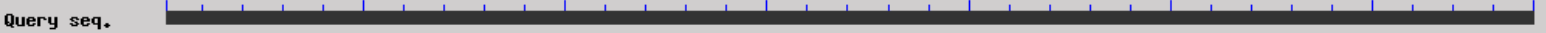

|                   |                                                                                             |
|-------------------|---------------------------------------------------------------------------------------------|
| Specific hits     | <div><div>p23_NUDC_like</div></div>                                                         |
| Non-specific hits | <div><div>kgd</div></div>                                                                   |
| Superfamilies     | <div><div>kgd superfamily</div></div> <div>alpha-crystallin-Hsps_p23-like superfamily</div> |

Chlamydomonas reinhardtii

CHLRE\_08g36940

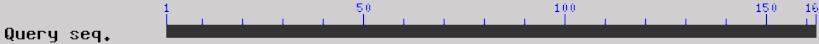

|               |                                                                                |
|---------------|--------------------------------------------------------------------------------|
| Specific hits | <div><div>p23_NUDC_like</div></div>                                            |
| Superfamilies | <div><div>CS</div></div> <div>alpha-crystallin-Hsps_p23-like superfamily</div> |

CHLRE\_13g59040

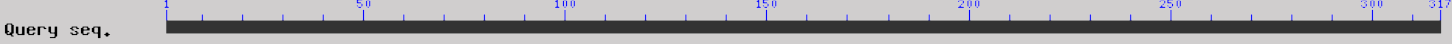

|                   |                                                                                             |
|-------------------|---------------------------------------------------------------------------------------------|
| Specific hits     | <div><div>FN3</div></div> <div><div>p23_NUDC_like</div></div>                               |
| Non-specific hits | <div><div>FN3</div></div> <div><div>fn3</div></div>                                         |
| Superfamilies     | <div><div>FN3 superfamily</div></div> <div>alpha-crystallin-Hsps_p23-like superfamily</div> |
