# Supplementary material for: Small Sized Yet Powerful: Nuclear Distribution C Proteins in Plants
Source: MDPI journal article supplement (doi:10.3390/plants13010119), 2023-12-31
Supplement: s1 [file s1]

**Table S1.** Retrieved *AtBOB1* homologs across eukaryotes*AtBOB1* homologs in plants and algae

| Organism                               | Locus ID                   | Gene name              | Uniprot ID         | Number of exons | Protein length (aa) | Protein domains & positions           | Maximum organ expression           | Intracellular localization (found/predicted) | Functions (found/predicted)                                                                                                                                                                                                                                                                                                             | References                                                   |
|----------------------------------------|----------------------------|------------------------|--------------------|-----------------|---------------------|---------------------------------------|------------------------------------|----------------------------------------------|-----------------------------------------------------------------------------------------------------------------------------------------------------------------------------------------------------------------------------------------------------------------------------------------------------------------------------------------|--------------------------------------------------------------|
| <i>Arabidopsis thaliana</i>            | <i>At4g27890</i>           | <i>BOBBER 2 (BOB2)</i> | A0A5S9XWX5, Q9STN7 | 3               | 293                 | CS (131-220); p23_NUDC_like (136-220) | root, stem, flower, silique, seed  | cytoplasm                                    | unfolded protein binding, protein folding, response to stress                                                                                                                                                                                                                                                                           | Jurkuta et al. (2009); Perez et al. (2009)                   |
| <i>Arabidopsis thaliana</i>            | <i>At5g53400</i>           | <i>BOBBER1 (BOB1)</i>  | Q9LV09             | 6               | 304                 | CS (142-231); p23_NUDC_like (147-231) | root, shoot, flower, silique, seed | cytoplasm, cytoplasmic granules              | protein folding, response to heat, pollen development, response to high light intensity, embryonic pattern specification, leaf morphogenesis, inflorescence meristem growth, developmental process, response to endoplasmic reticulum stress, response to hydrogen peroxide, stamen morphogenesis, specification of floral organ number | Jurkuta et al. (2009); Perez et al. (2009); Kaplinsky (2009) |
| <i>Arabidopsis thaliana</i>            | <i>At5g58740</i>           | <i>NMig1</i>           | Q8VXX3, A0A178UER9 | 5               | 158                 | CS (16-104); p23_NUDC_like (21-104)   | root, flower, silique, seed        | cytoplasm, nucleus                           | unfolded protein binding, protein folding, response to stress, root development                                                                                                                                                                                                                                                         | Velinov et al. (2020); Velinov et al. (2021)                 |
| <i>Brassica napus</i>                  | <i>GSBRNA2T00004948001</i> | <i>BnaA10g29540D</i>   | A0A078IM25         | 5               | 158                 | CS (16-104); p23_NUDC_like (21-104)   |                                    | cytoplasm                                    | unfolded protein binding, protein folding, response to stress                                                                                                                                                                                                                                                                           |                                                              |
| <i>Brassica napus</i>                  | <i>GSBRNA2T00044314001</i> | <i>BnaA03g48890D</i>   | A0A078GZ49         | 2               | 287                 | CS (126-215); p23_NUDC_like (131-215) |                                    | cytoplasm                                    | unfolded protein binding, protein folding, response to stress                                                                                                                                                                                                                                                                           |                                                              |
| <i>Brassica napus</i>                  | <i>GSBRNA2T00044313001</i> | <i>BnaA03g48880D</i>   | A0A078GXE8         | 2               | 308                 | CS (148-238); p23_NUDC_like (153-235) |                                    | cytoplasm                                    | unfolded protein binding, protein folding, response to stress                                                                                                                                                                                                                                                                           |                                                              |
| <i>Brassica napus</i>                  | <i>GSBRNA2T00094192001</i> | <i>BnaC03g34480D</i>   | A0A078IU54         | 2               | 209                 | CS (47-136); p23_NUDC_like (52-133)   |                                    | cytoplasm                                    | unfolded protein binding, protein folding, response to stress                                                                                                                                                                                                                                                                           |                                                              |
| <i>Brassica napus</i>                  | <i>GSBRNA2T00006266001</i> | <i>BnaC01g20510D</i>   | A0A078G219         | 3               | 226                 | CS (64-153); p23_NUDC_like (69-153)   |                                    | cytoplasm                                    | unfolded protein binding, protein folding, response to stress                                                                                                                                                                                                                                                                           |                                                              |
| <i>Brassica rapa subsp. pekinensis</i> | <i>Bra002621</i>           | <i>Bra002621</i>       | A0A397XSX1         | 5               | 158                 | CS (16-104); p23_NUDC_like (21-104)   |                                    | cytoplasm                                    | response to stress                                                                                                                                                                                                                                                                                                                      |                                                              |
| <i>Brassica rapa subsp. pekinensis</i> | <i>Bra040837</i>           | <i>Bra040837</i>       | M4FIA8             | 2               | 290                 | CS (129-218); p23_NUDC_like (134-218) |                                    |                                              | unfolded protein binding, protein folding, response to stress                                                                                                                                                                                                                                                                           |                                                              |
| <i>Brassica rapa subsp. pekinensis</i> | <i>Bra040836</i>           | <i>Bra040836</i>       | A0A397L8K8         | 1               | 305                 | CS (145-235); p23_NUDC_like (150-232) |                                    |                                              | response to stress                                                                                                                                                                                                                                                                                                                      |                                                              |

|                                        |                  |                    |                       |   |     |                                                             |                     |                    |                                                                                             |                   |
|----------------------------------------|------------------|--------------------|-----------------------|---|-----|-------------------------------------------------------------|---------------------|--------------------|---------------------------------------------------------------------------------------------|-------------------|
| <i>Brassica rapa subsp. pekinensis</i> | Bra026300        | Bra026300          | M4EBZ1                | 2 | 289 | CS (127-216);<br>p23_NUDC_like<br>(132-216)                 |                     | cytoplasm          | unfolded protein binding, protein folding,<br>response to stress                            |                   |
| <i>Brassica rapa subsp. pekinensis</i> | Bra003059        | Bra003059          | M4CFS7                | 6 | 279 | CS (117-206);<br>p23_NUDC_like<br>(122-206)                 |                     | cytoplasm          | unfolded protein binding, protein folding,<br>response to stress                            |                   |
| <i>Capsicum annuum</i>                 | T459_18329       | T459_18329         | A0A1U8HBB2            | 5 | 158 | CS (16-104);<br>p23_NUDC_like<br>(21-104)                   |                     | cytoplasm, nucleus | unfolded protein binding, protein folding,<br>response to stress                            |                   |
| <i>Capsicum annuum</i>                 | T459_07419       | T459_07419         | A0A2G2ZTM5            | 1 | 153 | CS (25-120);<br>p23_NUDC_like<br>(30-120)                   |                     | cytoplasm          | unfolded protein binding, protein folding,<br>response to stress                            |                   |
| <i>Capsicum annuum</i>                 | T459_07420       | T459_07420         | A0A2G2ZTK9            | 2 | 245 | CS (60-149);<br>p23_NUDC_like<br>(65-149)                   |                     | cytoplasm          | unfolded protein binding, protein folding,<br>response to stress                            |                   |
| <i>Capsicum annuum</i>                 | T459_27622       | T459_27622         | A0A2G2YEH3            | 1 | 117 | NudC (6-110);<br>HSP20-like<br>chaperone (4-73)             |                     | cytoplasm          | unfolded protein binding, protein folding                                                   |                   |
| <i>Capsicum annuum</i>                 | T459_07418       | T459_07418         | A0A2G2ZTL8            | 2 | 254 | CS (82-171);<br>p23_NUDC_like<br>(87-171)                   |                     | cytoplasm          | unfolded protein binding, protein folding,<br>response to stress                            |                   |
| <i>Capsicum annuum</i>                 | T459_16487       | T459_16487         | A0A2G2Z984            | 6 | 286 | CS (124-213);<br>p23_NUDC_like<br>(129-213)                 |                     | cytoplasm          | unfolded protein binding, protein folding,<br>response to stress                            |                   |
| <i>Capsicum annuum</i>                 | T459_09591       | T459_09591         | A0A1U8FZY1            | 6 | 307 | CS (145-234);<br>p23_NUDC_like<br>(150-234)                 |                     | cytoplasm          | unfolded protein binding, protein folding,<br>response to stress                            |                   |
| <i>Lactuca sativa</i>                  | LSAT_2X122940    | LSAT_2X122940      | A0A2J6M261            | 5 | 158 | CS (16-104);<br>p23_NUDC_like<br>(21-104)                   |                     | cytoplasm          | unfolded protein binding, protein folding,<br>response to stress                            |                   |
| <i>Lactuca sativa</i>                  | LSAT_9X56360     | LSAT_9X56360       | A0A2J6KDI6            | 6 | 306 | CS (144-233);<br>p23_NUDC_like<br>(149-233)                 |                     | cytoplasm          | unfolded protein binding, protein folding,<br>response to stress                            |                   |
| <i>Solanum lycopersicum</i>            | Solyc06g076940.3 | SIBOBBER1 (SIBOB1) | A0A3Q7HXJ3,<br>K4CA52 | 5 | 158 | CS (16-104);<br>p23_NUDC_like<br>(21-104)                   | root, fruit, seed   | cytoplasm          | unfolded protein binding, protein folding,<br><b>developmental process, immune response</b> | Liu et al. (2019) |
| <i>Solanum lycopersicum</i>            | Solyc09g092210.3 | Solyc09g092210.3   | A0A3Q7I8N0            | 3 | 205 | CS (58-147);<br>p23_NUDC_like<br>(63-147)                   | flower, fruit       | cytoplasm          | unfolded protein binding, protein folding,<br>response to stress                            |                   |
| <i>Solanum lycopersicum</i>            | Solyc02g062410.2 | SIBOBBER2 (SIBOB2) | A0A3Q7FJG8            | 2 | 226 | CS (54-143);<br>NudC (10-204);<br>p23_NUDC_like<br>(59-143) | flower, fruit       | cytoplasm          | unfolded protein binding, protein folding,<br>response to stress                            | Liu et al. (2019) |
| <i>Solanum lycopersicum</i>            | Solyc09g092200.2 | Solyc09g092200.2   | A0A3Q7I8G7            | 4 | 219 | CS (39-135);<br>p23_NUDC_like<br>(44-135)                   | flower, fruit       | cytoplasm          | unfolded protein binding, protein folding,<br>response to stress                            |                   |
| <i>Solanum lycopersicum</i>            | Solyc06g051950.3 | SIBOBBER3 (SIBOB3) | A0A3Q7HNZ6            | 9 | 347 | CS (191-280);<br>p23_NUDC_like<br>(196-280)                 | flower, fruit, seed | cytoplasm          | response to stress, immune response                                                         | Liu et al. (2019) |

|                             |                             |                             |                       |   |     |                                              |                              |                    |                                                                  |  |
|-----------------------------|-----------------------------|-----------------------------|-----------------------|---|-----|----------------------------------------------|------------------------------|--------------------|------------------------------------------------------------------|--|
| <i>Solanum lycopersicum</i> | <i>Solyc03g083390.3</i>     | 101255475                   | K4BIB5,<br>A0A3Q7FN48 | 6 | 302 | CS (140-229);<br>p23_NUDC_like<br>(145-229)  | stem, flower,<br>fruit, seed | cytoplasm          | unfolded protein binding, protein folding,<br>response to stress |  |
| <i>Solanum tuberosum</i>    | <i>PGSC0003DMG400030355</i> | 102588480                   | M1CZA6                | 5 | 158 | CS (16-104);<br>p23_NUDC_like<br>(21-104)    |                              | cytoplasm, nucleus | unfolded protein binding, protein folding,<br>response to stress |  |
| <i>Solanum tuberosum</i>    | <i>PGSC0003DMG400026423</i> | <i>PGSC0003DMG400026423</i> | M1CI53                | 2 | 247 | CS (62-151);<br>p23_NUDC_like<br>(67-151)    |                              | cytoplasm          | unfolded protein binding, protein folding,<br>response to stress |  |
| <i>Solanum tuberosum</i>    | <i>PGSC0003DMG400046575</i> | <i>PGSC0003DMG400046575</i> | M1DZP7                | 2 | 211 | CS (39-128);<br>p23_NUDC_like<br>(44-128)    |                              | cytoplasm          | unfolded protein binding, protein folding,<br>response to stress |  |
| <i>Solanum tuberosum</i>    | <i>PGSC0003DMG400009123</i> | 102577908                   | Q38HV0                | 6 | 308 | CS (146-235);<br>p23_NUDC_like<br>(151-235)  |                              | cytoplasm          | unfolded protein binding, protein folding,<br>response to stress |  |
| <i>Nicotiana tabacum</i>    | <i>LOC107815638</i>         | <i>LOC107815638</i>         | A0A1S4C715            | 5 | 158 | CS (16-104);<br>p23_NUDC_like<br>(21-104)    |                              | cytoplasm          | unfolded protein binding, protein folding,<br>response to stress |  |
| <i>Nicotiana tabacum</i>    | <i>LOC107796635</i>         | <i>LOC107796635</i>         | A0A1S4AEN1            | 5 | 158 | CS (16-104)                                  |                              | cytoplasm          | unfolded protein binding, protein folding,<br>response to stress |  |
| <i>Nicotiana tabacum</i>    | <i>LOC107769666</i>         | <i>LOC107769666</i>         | A0A1S3XWY9            | 1 | 170 | CS (49-138)                                  |                              | cytoplasm          | unfolded protein binding, protein folding,<br>response to stress |  |
| <i>Nicotiana tabacum</i>    | <i>LOC107769667</i>         | <i>LOC107769667</i>         | A0A1S3XWY7            | 2 | 251 | CS (65-154);<br>p23_NUDC_like<br>(54-138)    |                              | cytoplasm          | unfolded protein binding, protein folding,<br>response to stress |  |
| <i>Nicotiana tabacum</i>    | <i>LOC107785569</i>         | <i>LOC107785569</i>         | A0A1S3ZD95            | 1 | 230 | CS (57-146);<br>p23_NUDC_like<br>(62-146)    |                              | cytoplasm          | unfolded protein binding, protein folding,<br>response to stress |  |
| <i>Nicotiana tabacum</i>    | <i>LOC107779500</i>         | <i>LOC107779500</i>         | A0A1S3YTB1            | 1 | 213 | CS (46-135)                                  |                              | cytoplasm          | unfolded protein binding, protein folding,<br>response to stress |  |
| <i>Nicotiana tabacum</i>    | <i>LOC107791897</i>         | <i>LOC107791897</i>         | A0A1S3ZYN1            | 2 | 166 | CS (46-135)                                  |                              | cytoplasm          | unfolded protein binding, protein folding,<br>response to stress |  |
| <i>Nicotiana tabacum</i>    | <i>LOC107790710</i>         | <i>LOC107790710</i>         | A0A1S3ZUT2            | 2 | 240 | CS (67-156)                                  |                              | cytoplasm          | unfolded protein binding, protein folding,<br>response to stress |  |
| <i>Nicotiana tabacum</i>    | <i>LOC107816713</i>         | <i>LOC107816713</i>         | A0A1S4CA10            | 6 | 289 | CS ( 127-216);<br>p23_NUDC_like<br>(132-216) |                              | cytoplasm          | unfolded protein binding, protein folding,<br>response to stress |  |
| <i>Nicotiana tabacum</i>    | <i>LOC107775992</i>         | <i>LOC107775992</i>         | A0A1S3YGN1            | 6 | 299 | CS (137-226)                                 |                              | cytoplasm          | unfolded protein binding, protein folding,<br>response to stress |  |
| <i>Nicotiana tabacum</i>    | <i>LOC107798015</i>         | <i>LOC107798015</i>         | A0A1S4AIB2            | 6 | 301 | CS (139-228);<br>p23_NUDC_like<br>(144-228)  |                              | cytoplasm          | unfolded protein binding, protein folding,<br>response to stress |  |
| <i>Cucumis sativus</i>      | <i>Csa1G530660</i>          | <i>Csa1G530660</i>          | A0A0A0LV57            | 5 | 156 | CS (16-104);<br>p23_NUDC_like<br>(21-104)    |                              | cytoplasm, nucleus | unfolded protein binding, protein folding,<br>response to stress |  |
| <i>Cucumis sativus</i>      | <i>Csa5G139440</i>          | <i>Csa5G139440</i>          | A0A0A0KQ62            | 6 | 315 | CS (153-242);<br>p23_NUDC_like<br>(158-242)  |                              | cytoplasm          | unfolded protein binding, protein folding,<br>response to stress |  |
| <i>Medicago truncatula</i>  | <i>MTR_3g463620</i>         | <i>MTR_3g463620</i>         | A0A072UXE1,<br>I3SF11 | 4 | 180 | CS (44-132);<br>p23_NUDC_like<br>(49-132)    | root                         | cytoplasm, nucleus | response to stress                                               |  |

|                            |                 |                 |                |   |     |                                             |                         |                     |                                                                  |  |
|----------------------------|-----------------|-----------------|----------------|---|-----|---------------------------------------------|-------------------------|---------------------|------------------------------------------------------------------|--|
| <i>Medicago truncatula</i> | MTR_1g008195    | 25481856        | A0A072VDR8     | 6 | 290 | CS (128-217);<br>p23_NUDC_like<br>(133-217) | seed                    | cytoplasm           | unfolded protein binding, protein folding,<br>response to stress |  |
| <i>Medicago truncatula</i> | MTR_1g008170    | 11431318        | G7I4A6         | 6 | 289 | CS (128-217);<br>p23_NUDC_like<br>(133-217) | seed                    | cytoplasm           | unfolded protein binding, protein folding,<br>response to stress |  |
| <i>Medicago truncatula</i> | MTR_1g008200    | 11429600        | G7I4A8         | 6 | 295 | CS (133-222);<br>p23_NUDC_like<br>(138-222) | nodule                  | cytoplasm           | unfolded protein binding, protein folding,<br>response to stress |  |
| <i>Glycine max</i>         | GLYMA_11G175500 | GLYMA_11G175500 | C6SYT5, I1LLK0 | 5 | 158 | CS (16-104);<br>p23_NUDC_like<br>(21-104)   | leaf, seed              | cytoplasm           | unfolded protein binding, protein folding,<br>response to stress |  |
| <i>Glycine max</i>         | GLYMA_18G063100 | 100306544       | C6SZU0         | 5 | 158 | CS (16-104);<br>p23_NUDC_like<br>(21-104)   | nodule, seed,<br>embryo | cytoplasm           | unfolded protein binding, protein folding,<br>response to stress |  |
| <i>Glycine max</i>         | GLYMA_06G128000 | 100775670       | I1KAR6         | 6 | 299 | CS (137-226);<br>p23_NUDC_like<br>(142-226) | nodule, embryo          | cytoplasm           | unfolded protein binding, protein folding,<br>response to stress |  |
| <i>Glycine max</i>         | GLYMA_04G236300 | 100813799       | C6TKE3         | 6 | 301 | CS (139-228);<br>p23_NUDC_like<br>(144-228) | nodule, embryo          | cytoplasm           | unfolded protein binding, protein folding,<br>response to stress |  |
| <i>Eucalyptus grandis</i>  | EUGRSUZ_B02255  | EUGRSUZ_B02255  | A0A059D4G2     | 5 | 221 | CS (79-167);<br>p23_NUDC_like<br>(84-167)   |                         | cytoplasm, nucleus  | unfolded protein binding, protein folding,<br>response to stress |  |
| <i>Eucalyptus grandis</i>  | EUGRSUZ_A01460  | EUGRSUZ_A01460  | A0A059DEY7     | 7 | 407 | CS (245-334);<br>p23_NUDC_like<br>(250-334) |                         | cytoplasm, membrane | unfolded protein binding, protein folding,<br>response to stress |  |
| <i>Juglans regia</i>       | LOC109002082    | LOC109002082    | A0A6P9EDV6     | 6 | 180 | CS (24-123);<br>p23_NUDC_like<br>(29-123)   |                         | cytoplasm           | unfolded protein binding, protein folding,<br>response to stress |  |
| <i>Juglans regia</i>       | LOC109015374    | LOC109015374    | A0A6P9EFR4     | 5 | 158 | CS (16-104);<br>p23_NUDC_like<br>(21-104)   |                         | cytoplasm           | unfolded protein binding, protein folding,<br>response to stress |  |
| <i>Juglans regia</i>       | LOC108980108    | LOC108980108    | A0A2I4DH47     | 1 | 280 | CS (118-207);<br>p23_NUDC_like<br>(123-207) |                         | cytoplasm, nucleus  | unfolded protein binding, protein folding,<br>response to stress |  |
| <i>Juglans regia</i>       | LOC108982868    | LOC108982868    | A0A2I4DRW5     | 6 | 296 | CS (134-223);<br>p23_NUDC_like<br>(139-223) |                         | cytoplasm           | unfolded protein binding, protein folding,<br>response to stress |  |
| <i>Juglans regia</i>       | LOC109013205    | LOC109013205    | A0A2I4H3N7     | 6 | 296 | CS (134-223);<br>p23_NUDC_like<br>(139-223) |                         | cytoplasm           | unfolded protein binding, protein folding,<br>response to stress |  |
| <i>Theobroma cacao</i>     | TCM_041625      | TCM_041625      | A0A061GV77     | 5 | 158 | CS (16-104);<br>p23_NUDC_like<br>(21-104)   |                         | cytoplasm           | unfolded protein binding, protein folding,<br>response to stress |  |
| <i>Theobroma cacao</i>     | TCM_021712      | TCM_021712      | A0A061EYB6     | 1 | 174 | CS (12-101);<br>p23_NUDC_like<br>(18-101)   |                         | cytoplasm           | unfolded protein binding, protein folding,<br>response to stress |  |
| <i>Theobroma cacao</i>     | TCM_015401      | TCM_015401      | A0A061G2U6     | 6 | 295 | CS (133-222);<br>p23_NUDC_like<br>(138-222) |                         | cytoplasm           | unfolded protein binding, protein folding,<br>response to stress |  |
| <i>Manihot esculenta</i>   | MANES_02G119500 | MANES_02G119500 | A0A2C9WD44     | 5 | 158 | CS (16-104);<br>p23_NUDC_like<br>(21-104)   |                         | cytoplasm           | unfolded protein binding, protein folding,<br>response to stress |  |
| <i>Manihot esculenta</i>   | MANES_01G161700 | MANES_01G161700 | A0A2C9WLD1     | 5 | 158 | CS (16-104);<br>p23_NUDC_like<br>(21-104)   |                         | cytoplasm           | unfolded protein binding, protein folding,<br>response to stress |  |

|                            |                      |                      |            |   |     |                                             |  |                                               |                                                                                                                                                                         |  |
|----------------------------|----------------------|----------------------|------------|---|-----|---------------------------------------------|--|-----------------------------------------------|-------------------------------------------------------------------------------------------------------------------------------------------------------------------------|--|
| <i>Manihot esculenta</i>   | MANES_14G006200      | MANES_14G006200      | A0A2C9UIQ0 | 6 | 320 | CS (158-247);<br>p23_NUDC_like<br>(163-247) |  | cytoplasm                                     | unfolded protein binding, protein folding,<br>response to stress                                                                                                        |  |
| <i>Manihot esculenta</i>   | MANES_06G160400      | MANES_06G160400      | A0A2C9VRD1 | 4 | 286 | CS (223-286);<br>p23_NUDC_like<br>(228-286) |  | cytoplasm, membrane                           | unfolded protein binding, protein folding,<br>response to stress                                                                                                        |  |
| <i>Manihot esculenta</i>   | MANES_06G160000      | MANES_06G160000      | A0A2C9VST6 | 3 | 252 | CS (178-252);<br>p23_NUDC_like<br>(183-244) |  |                                               | response to stress                                                                                                                                                      |  |
| <i>Prunus persica</i>      | PRUPE_6G057600       | PRUPE_6G057600       | M5W0J7     | 5 | 158 | CS (16-104);<br>p23_NUDC_like<br>(21-104)   |  | cytoplasm, nucleus                            | unfolded protein binding, protein folding,<br>response to stress                                                                                                        |  |
| <i>Prunus persica</i>      | PRUPE_2G310800       | PRUPE_2G310800       | M5XEL2     | 6 | 296 | CS (16-104);<br>p23_NUDC_like<br>(21-104)   |  | cytoplasm, endoplasmic<br>reticulum, membrane | calcium ion binding, unfolded protein<br>binding, unfolded protein binding,<br>endoplasmic reticulum calcium ion<br>homeostasis, protein folding, response to<br>stress |  |
| <i>Erythranthe guttata</i> | MIMGU_mgv1a015421mg  | MIMGU_mgv1a015421mg  | A0A022RC76 | 6 | 158 | CS (16-104);<br>p23_NUDC_like<br>(21-104)   |  | cytoplasm                                     | unfolded protein binding, protein folding,<br>response to stress                                                                                                        |  |
| <i>Erythranthe guttata</i> | MIMGU_mgv1a010735mg  | MIMGU_mgv1a010735mg  | A0A022PVU0 | 6 | 303 | CS (141-230);<br>p23_NUDC_like<br>(146-230) |  | cytoplasm                                     | unfolded protein binding, protein folding,<br>response to stress                                                                                                        |  |
| <i>Erythranthe guttata</i> | MIMGU_mgv1a011251mg  | MIMGU_mgv1a011251mg  | A0A022QB71 | 6 | 288 | CS (126-215);<br>p23_NUDC_like<br>(131-215) |  | cytoplasm                                     | unfolded protein binding, protein folding,<br>response to stress                                                                                                        |  |
| <i>Helianthus annuus</i>   | HannXRQ_Ch07g0202931 | HannXRQ_Ch07g0202931 | A0A251UEM1 | 5 | 158 | CS (16-104);<br>p23_NUDC_like<br>(21-104)   |  | cytoplasm                                     | unfolded protein binding, protein folding,<br>response to stress                                                                                                        |  |
| <i>Helianthus annuus</i>   | HannXRQ_Ch08g0221811 | HannXRQ_Ch08g0221811 | A0A251U4P2 | 5 | 158 | CS (16-104);<br>p23_NUDC_like<br>(21-104)   |  | cytoplasm                                     | unfolded protein binding, protein folding,<br>response to stress                                                                                                        |  |
| <i>Helianthus annuus</i>   | HannXRQ_Ch09g0267241 | BOB1                 | A0A251TY55 | 6 | 293 | CS (131-220)                                |  | cytoplasm                                     | unfolded protein binding, protein folding,<br>response to stress                                                                                                        |  |
| <i>Populus trichocarpa</i> | POPTR_003G100900v3   | POPTR_003G100900     | B9GZU9     | 1 | 272 | CS (103-192);<br>p23_NUDC_like<br>(109-192) |  | cytoplasm                                     | unfolded protein binding, protein folding,<br>response to stress                                                                                                        |  |
| <i>Populus trichocarpa</i> | POPTR_001G132500v3   | POPTR_001G132500     | A0A2K2BWX2 | 1 | 261 | CS (104-193)                                |  |                                               | response to stress                                                                                                                                                      |  |
| <i>Populus trichocarpa</i> | POPTR_015G013900v3   | POPTR_015G013900     | A0A2K1XGH3 | 6 | 300 | CS (138-227)                                |  | cytoplasm                                     | unfolded protein binding, protein folding,<br>response to stress                                                                                                        |  |
| <i>Populus trichocarpa</i> | POPTR_012G014100v3   | POPTR_012G014100     | A0A2K1Y782 | 6 | 289 | CS (127-216)                                |  | cytoplasm                                     | unfolded protein binding, protein folding,<br>response to stress                                                                                                        |  |
| <i>Ricinus communis</i>    | RCOM_0612440         | RCOM_0612440         | B9SI21     | 6 | 158 | CS (16-104);<br>p23_NUDC_like<br>(21-104)   |  | cytoplasm                                     | unfolded protein binding, protein folding,<br>response to stress                                                                                                        |  |
| <i>Ricinus communis</i>    | RCOM_0169970         | RCOM_0169970         | B9T3X1     | 3 | 87  |                                             |  | cytoplasm                                     | unfolded protein binding, protein folding                                                                                                                               |  |
| <i>Ricinus communis</i>    | RCOM_0597500         | RCOM_0597500         | B9SJ06     | 2 | 209 | CS (47-136);<br>p23_NUDC_like<br>(53-135)   |  | cytoplasm                                     | unfolded protein binding, protein folding,<br>response to stress                                                                                                        |  |
| <i>Ricinus communis</i>    | RCOM_1579230         | RCOM_1579230         | B9RIH7     | 6 | 307 | CS (151-240);<br>p23_NUDC_like<br>(156-240) |  | cytoplasm                                     | unfolded protein binding, protein folding,<br>response to stress                                                                                                        |  |
| <i>Gossypium hirsutum</i>  | LOC107936543         | LOC107936543         | A0A1U8MGZ5 | 5 | 158 | CS (16-104);<br>p23_NUDC_like<br>(21-104)   |  | cytoplasm                                     | unfolded protein binding, protein folding,<br>response to stress                                                                                                        |  |

|                                          |                                                     |                   |            |   |     |                                             |  |                    |                                                                  |  |
|------------------------------------------|-----------------------------------------------------|-------------------|------------|---|-----|---------------------------------------------|--|--------------------|------------------------------------------------------------------|--|
| <i>Gossypium hirsutum</i>                | LOC107891963                                        | LOC107891963      | A0A1U8I2D0 | 5 | 158 | CS (16-104);<br>p23_NUDC_like<br>(21-104)   |  | cytoplasm          | unfolded protein binding, protein folding,<br>response to stress |  |
| <i>Gossypium hirsutum</i>                | LOC107946804                                        | LOC107946804      | A0A1U8NCM9 | 1 | 269 | CS (107-196);<br>p23_NUDC_like<br>(111-194) |  | cytoplasm          | unfolded protein binding, protein folding,<br>response to stress |  |
| <i>Gossypium hirsutum</i>                | LOC107947245                                        | LOC107947245      | A0A1U8NE51 | 6 | 291 | CS (129-218);<br>p23_NUDC_like<br>(134-218) |  |                    | response to stress                                               |  |
| <i>Gossypium hirsutum</i>                | LOC107930277                                        | LOC107930277      | A0A1U8LS30 | 6 | 289 | CS (127-216);<br>p23_NUDC_like<br>(132-216) |  | cytoplasm          | unfolded protein binding, protein folding,<br>response to stress |  |
| <i>Gossypium hirsutum</i>                | LOC107929622                                        | LOC107929622      | A0A1U8LPU0 | 6 | 296 | CS (134-223);<br>p23_NUDC_like<br>(139-223) |  |                    | response to stress                                               |  |
| <i>Gossypium hirsutum</i>                | LOC107894867                                        | LOC107894867      | A0A1U8IGS2 | 7 | 285 | CS (123-212);<br>p23_NUDC_like<br>(128-212) |  | cytoplasm          | unfolded protein binding, protein folding,<br>response to stress |  |
| <i>Gossypium hirsutum</i>                | LOC107944939                                        | LOC107944939      | A0A1U8N5J0 | 1 | 270 | CS (111-200);<br>p23_NUDC_like<br>(116-200) |  | cytoplasm          | unfolded protein binding, protein folding,<br>response to stress |  |
| <i>Gossypium hirsutum</i>                | LOC107944267                                        | LOC107944267      | A0A1U8N3B4 | 1 | 269 | CS (111-200);<br>p23_NUDC_like<br>(116-200) |  | cytoplasm          | unfolded protein binding, protein folding,<br>response to stress |  |
| <i>Gossypium hirsutum</i>                | LOC107890769                                        | LOC107890769      | A0A1U8HXR4 | 6 | 289 | CS (127-216);<br>p23_NUDC_like<br>(132-216) |  | cytoplasm          | unfolded protein binding, protein folding,<br>response to stress |  |
| <i>Vitis vinifera</i>                    | VIT_12s0142g00120                                   | VIT_12s0142g00120 | D7TR32     | 6 | 158 | CS (16-104);<br>p23_NUDC_like<br>(21-104)   |  | cytoplasm          | unfolded protein binding, protein folding,<br>response to stress |  |
| <i>Vitis vinifera</i>                    | VIT_16s0098g00370                                   | VIT_16s0098g00370 | E0CVH6     | 6 | 289 | CS (127-216);<br>p23_NUDC_like<br>(132-216) |  | cytoplasm          | unfolded protein binding, protein folding,<br>response to stress |  |
| <i>Nelumbo nucifera</i>                  | LOC104601263                                        | LOC104601263      | A0A1U8AKM9 | 5 | 130 | CS (16-104);<br>p23_NUDC_like<br>(21-104)   |  |                    |                                                                  |  |
| <i>Nelumbo nucifera</i>                  | LOC104604013                                        | LOC104604013      | A0A1U8AHB1 | 6 | 315 | CS (153-242);<br>p23_NUDC_like<br>(158-242) |  | cytoplasm          | unfolded protein binding, protein folding                        |  |
| <i>Musa acuminata subsp. malaccensis</i> | GSMUA_Achr6G27580_001<br>(Ma06_t29350.1)            | 103989249         | A0A804JLS5 | 5 | 158 | CS (16-104)                                 |  |                    |                                                                  |  |
| <i>Musa acuminata subsp. malaccensis</i> | GSMUA_Achr2G07330_001<br>(Ma02_t09250.1)            | 103976403         | A0A804I0W5 |   | 282 | CS (120-209)                                |  |                    |                                                                  |  |
| <i>Musa acuminata subsp. malaccensis</i> | GSMUA_Achr11G13090_001<br>(Ma11_t11290.1)           | 103971323         | A0A804L6P6 | 6 | 306 | CS (144-233);<br>p23_NUDC_like<br>(149-233) |  |                    |                                                                  |  |
| <i>Brachypodium distachyon</i>           | BRADI_5g07310v3                                     | 100828146         | I1IWY1     | 5 | 158 | CS (16-104);<br>p23_NUDC_like<br>(21-104)   |  | cytoplasm, nucleus | unfolded protein binding, protein folding                        |  |
| <i>Brachypodium distachyon</i>           | BRADI_1g45080v3                                     | 100832845         | I1GZi6     | 6 | 322 | CS (170-259);<br>p23_NUDC_like<br>(175-259) |  | cytoplasm          | unfolded protein binding, protein folding                        |  |
| <i>Brachypodium distachyon</i>           | BRADI_2g05060v3                                     | 100839208         | I1HCN3     | 6 | 183 | CS (21-110);<br>p23_NUDC_like<br>(26-110)   |  | cytoplasm          | unfolded protein binding, protein folding                        |  |
| <i>Hordeum vulgare subsp. vulgare</i>    | HORVU2Hr1G068470<br>(HORVU.MOREX.r3.2HG016129<br>0) |                   | F2CY14     | 5 | 158 | CS (16-104)                                 |  | cytoplasm, nucleus | unfolded protein binding, protein folding                        |  |

|                                              |                                                 |                                 |                       |   |     |                                             |                                                                        |                    |                                                                  |  |
|----------------------------------------------|-------------------------------------------------|---------------------------------|-----------------------|---|-----|---------------------------------------------|------------------------------------------------------------------------|--------------------|------------------------------------------------------------------|--|
| <i>Hordeum vulgare</i> subsp. <i>vulgare</i> | HORVU3Hr1G110760<br>(HORVU.MOREX.r3.3HG0323660) |                                 | A0A8I6Y2S2            | 2 | 217 | CS (54-143)                                 |                                                                        |                    |                                                                  |  |
| <i>Hordeum vulgare</i> subsp. <i>vulgare</i> | HORVU3Hr1G110720<br>(HORVU.MOREX.r3.3HG0323630) |                                 | A0A8I6XCL8            | 1 | 214 | CS (54-143)                                 |                                                                        |                    |                                                                  |  |
| <i>Hordeum vulgare</i> subsp. <i>vulgare</i> | HORVU7Hr1G038520<br>(HORVU.MOREX.r3.7HG0666750) |                                 | F2E732                | 6 | 307 | CS (145-234)                                |                                                                        |                    |                                                                  |  |
| <i>Triticum aestivum</i>                     | <i>TraesCS2A02G279900</i>                       |                                 | A0A3B6AZB0            | 5 | 158 | CS (16-104);<br>p23_NUDC_like<br>(21-104)   | root, endosperm,<br>shoot axis, stigma<br>and ovary                    | cytoplasm          | unfolded protein binding, protein folding                        |  |
| <i>Triticum aestivum</i>                     | <i>TraesCS2B02G296900</i>                       |                                 | A0A3B6C6B1            | 6 | 158 | CS (16-104);<br>p23_NUDC_like<br>(21-104)   | root, leaf, embryo                                                     | cytoplasm          | unfolded protein binding, protein folding                        |  |
| <i>Triticum aestivum</i>                     | <i>TraesCS2D02G278900</i>                       |                                 | A0A3B6DDH6            | 5 | 158 | CS (16-104);<br>p23_NUDC_like<br>(21-104)   | root                                                                   | cytoplasm          | unfolded protein binding, protein folding                        |  |
| <i>Triticum aestivum</i>                     | <i>TraesCS3B02G566300</i>                       | <i>TRAES_3BF052700020CFD_c1</i> | W5D4R8                | 2 | 214 | CS (51-140);<br>p23_NUDC_like<br>(56-140)   |                                                                        | cytoplasm          | unfolded protein binding, protein folding                        |  |
| <i>Triticum aestivum</i>                     | <i>TraesCS3B02G566200</i>                       | <i>TRAES_3BF052700030CFD_c1</i> | W5D6E5                | 1 | 219 | CS (56-145);<br>p23_NUDC_like<br>(61-145)   |                                                                        | cytoplasm          | unfolded protein binding, protein folding                        |  |
| <i>Triticum aestivum</i>                     | <i>TraesCS3D02G509500</i>                       | <i>TraesCS3D02G509500</i>       | A0A3B6H3F0            | 2 | 214 | CS (51-140);<br>p23_NUDC_like<br>(56-140)   |                                                                        | cytoplasm          | unfolded protein binding, protein folding                        |  |
| <i>Triticum aestivum</i>                     | <i>TraesCS3A02G503000</i>                       | <i>TraesCS3A02G503000</i>       | A0A3B6ERA3            | 2 | 168 | CS (48-137);<br>p23_NUDC_like<br>(53-137)   |                                                                        | cytoplasm          | unfolded protein binding, protein folding                        |  |
| <i>Triticum aestivum</i>                     | <i>TraesCS3D02G509300</i>                       | <i>TraesCS3D02G509300</i>       | A0A3B6H6D2            | 1 | 214 | CS (51-140);<br>p23_NUDC_like<br>(56-140)   |                                                                        | cytoplasm          | unfolded protein binding, protein folding                        |  |
| <i>Triticum aestivum</i>                     | <i>TraesCS3A02G502900</i>                       | <i>TraesCS3A02G502900</i>       | A0A3B6EQH3            | 1 | 215 | CS (52-141);<br>p23_NUDC_like<br>(57-141)   |                                                                        | cytoplasm          | unfolded protein binding, protein folding                        |  |
| <i>Triticum aestivum</i>                     | <i>TraesCS7A02G189600</i>                       | <i>TraesCS7A02G189600</i>       | A0A3B6RFV2            | 6 | 316 | CS (154-243);<br>p23_NUDC_like<br>(159-243) | root, shoot, leaf,<br>stigma and ovary,<br>grain, endosperm,<br>embryo |                    |                                                                  |  |
| <i>Triticum aestivum</i>                     | <i>TraesCS7B02G094500</i>                       | <i>TraesCS7B02G094500</i>       | A0A3B6SDZ9            | 6 | 320 | CS (158-247);<br>p23_NUDC_like<br>(163-247) | root, shoot, leaf,<br>stigma and ovary,<br>embryo                      | cytoplasm          | unfolded protein binding, protein folding,<br>response to stress |  |
| <i>Triticum aestivum</i>                     | <i>TraesCS7D02G190700</i>                       | <i>TraesCS7D02G190700</i>       | A0A3B6TMJ0            | 6 | 314 | CS (152-241);<br>p23_NUDC_like<br>(157-241) | root, shoot, leaf,<br>stigma and ovary,<br>grain, endosperm,<br>embryo |                    |                                                                  |  |
| <i>Oryza sativa</i>                          | <i>Os01g0668000</i>                             | <i>Os01g0668000</i>             | B9EYI7                | 6 | 158 | CS (16-104);<br>p23_NUDC_like<br>(21-104)   |                                                                        | cytoplasm, nucleus | response to stress                                               |  |
| <i>Oryza sativa</i>                          | <i>Os02g0743800</i>                             | <i>Os02g0743800</i>             | A0A0P0VPG4,<br>Q6Z2U6 | 1 | 196 |                                             |                                                                        |                    |                                                                  |  |

|                                   |                      |                         |            |   |     |                                             |                                                    |                    |                                                                  |  |
|-----------------------------------|----------------------|-------------------------|------------|---|-----|---------------------------------------------|----------------------------------------------------|--------------------|------------------------------------------------------------------|--|
| <i>Oryza sativa</i>               | Os06g0231300         | Os06g0231300            | A3B9X9     | 6 | 308 | CS (146-235);<br>p23_NUDC_like<br>(151-235) |                                                    |                    |                                                                  |  |
| <i>Setaria italica</i>            | SETIT_011893mg       | SETIT_011893mg          | K3YCE7     | 5 | 301 | CS (159-247);<br>p23_NUDC_like<br>(164-247) |                                                    | cytoplasm          | unfolded protein binding, protein folding                        |  |
| <i>Setaria italica</i>            | SETIT_006940mg       | 101764727               | K3XYN4     | 6 | 285 | CS (120-212);<br>p23_NUDC_like<br>(147-212) |                                                    |                    |                                                                  |  |
| <i>Sorghum bicolor</i>            | SORBI_3001G301800    | SORBI_3001G301800       | C5WSG2     | 5 | 158 | CS (16-104);<br>p23_NUDC_like<br>(21-104)   |                                                    | cytoplasm          | unfolded protein binding, protein folding                        |  |
| <i>Sorghum bicolor</i>            | SORBI_3002G400200    | SORBI_3002G400200       | C5X444     | 5 | 159 | CS (16-105);<br>p23_NUDC_like<br>(21-105)   |                                                    | cytoplasm          | unfolded protein binding, protein folding                        |  |
| <i>Sorghum bicolor</i>            | SORBI_3001G520500    | SORBI_3001G520500       | C5WZY5     | 6 | 181 | CS (19-108);<br>p23_NUDC_like<br>(24-108)   |                                                    | cytoplasm          | unfolded protein binding, protein folding                        |  |
| <i>Sorghum bicolor</i>            | SORBI_3010G094500    | SORBI_3010G094500       | A0A194YI58 | 7 | 264 | CS (102-191);<br>p23_NUDC_like<br>(107-191) |                                                    |                    |                                                                  |  |
| <i>Zea mays</i>                   | Zm00001d015423       | 100283235               | B6T1R3     | 2 | 158 | CS (16-104)                                 | root, tassel, cob,<br>internode tissue,<br>seed    | cytoplasm          | unfolded protein binding, protein folding                        |  |
| <i>Zea mays</i>                   | Zm00001d007069       | ZEAMMB73_Zm00001d007069 | A0A1D6F2Q5 | 7 | 162 | p23_NUDC_like<br>(1-73)                     | root, internode<br>tissue, seed                    | cytoplasm          | unfolded protein binding, protein folding,<br>response to stress |  |
| <i>Zea mays</i>                   | Zm00001d044815       | 100282404               | B4G0G4     | 6 | 302 | CS (140-229);<br>p23_NUDC_like<br>(145-229) | root, shoot, leaf,<br>tassel, cob, seed,<br>embryo |                    | response to stress                                               |  |
| <i>Zea mays</i>                   | Zm00001d037236       | 100273219               | B4FTP9     | 6 | 308 | CS (146-235);<br>p23_NUDC_like<br>(151-235) | root, shoot, leaf,<br>tassel, cob, seed,<br>embryo | cytoplasm          | unfolded protein binding, protein folding,<br>response to stress |  |
| <i>Zostera marina</i>             | ZOSMA_112G00430      | ZOSMA_112G00430         | A0A0K9Q555 | 5 | 157 | CS (16-104)                                 |                                                    | cytoplasm          | unfolded protein binding, protein folding                        |  |
| <i>Zostera marina</i>             | ZOSMA_191G00110      | ZOSMA_191G00110         | A0A0K9PPK1 | 4 | 111 |                                             |                                                    | cytoplasm          | unfolded protein binding, protein folding                        |  |
| <i>Zostera marina</i>             | ZOSMA_325G00030      | ZOSMA_325G00030         | A0A0K9PAX6 | 6 | 205 | CS (77-166)                                 |                                                    | cytoplasm          | unfolded protein binding, protein folding                        |  |
| <i>Zostera marina</i>             | ZOSMA_21G00700       | ZOSMA_21G00700          | A0A0K9PJT1 | 6 | 333 | CS (171-260)                                |                                                    | cytoplasm          | unfolded protein binding, protein folding                        |  |
| <i>Amborella trichopoda</i>       | AMTR_s00029p00243890 | AMTR_s00029p00243890    | W1PIK0     | 4 | 139 | CS (16-104);<br>p23_NUDC_like<br>(21-104)   |                                                    | cytoplasm, nucleus | unfolded protein binding, protein folding                        |  |
| <i>Amborella trichopoda</i>       | AMTR_s00017p00231540 | AMTR_s00017p00231540    | W1PM11     | 6 | 311 | CS (148-237);<br>p23_NUDC_like<br>(21-104)  |                                                    | cytoplasm          | unfolded protein binding, protein folding                        |  |
| <i>Selaginella moellendorffii</i> | SELMODRAFT_121870    | SELMODRAFT_121870       | D8RGA0     | 5 | 157 | CS (16-104);<br>p23_NUDC_like<br>(21-104)   |                                                    | cytoplasm          | unfolded protein binding, protein folding                        |  |
| <i>Selaginella moellendorffii</i> | SELMODRAFT_115773    | SELMODRAFT_115773       | D8SFG5     | 5 | 169 | CS (6-96);<br>p23_NUDC_like<br>(11-96)      |                                                    | cytoplasm          | unfolded protein binding, protein folding                        |  |
| <i>Selaginella moellendorffii</i> | SELMODRAFT_85440     | SELMODRAFT_85440        | D8R5J0     | 5 | 169 | CS (6-96);<br>p23_NUDC_like<br>(11-96)      |                                                    | cytoplasm          | unfolded protein binding, protein folding                        |  |



|                                  |                   |                   |            |    |      |                                               |  |                    |                                           |  |
|----------------------------------|-------------------|-------------------|------------|----|------|-----------------------------------------------|--|--------------------|-------------------------------------------|--|
| <i>Physcomitrella patens</i>     | Pp3c16_190        | PHYPA_020249      | A9SZ22     | 6  | 158  | CS (17-105);<br>p23_NUDC_like<br>(22-105)     |  | cytoplasm, nucleus | unfolded protein binding, protein folding |  |
| <i>Physcomitrella patens</i>     | Pp3c24_16270      | PHYPA_029156      | A0A2K1IH15 | 3  | 148  | CS (8-103);<br>p23_NUDC_like<br>(13-103)      |  | cytoplasm          | unfolded protein binding, protein folding |  |
| <i>Physcomitrella patens</i>     | Pp3c11_14270      | PHYPA_015017      | A0A2K1JUQ1 | 6  | 392  | CS (230-319);<br>p23_NUDC_like<br>(235-319)   |  | cytoplasm          | unfolded protein binding, protein folding |  |
| <i>Physcomitrella patens</i>     | Pp3c4_23090       | PHYPA_006628      | A0A2K1KPQ5 | 6  | 472  | CS (284-373);<br>p23_NUDC_like<br>(289-373)   |  | cytoplasm          | unfolded protein binding, protein folding |  |
| <i>Physcomitrella patens</i>     | Pp3c2_28400       | Pp3c2_28400       | A0A2K1L3C1 | 2  | 278  | CS (194-236);<br>p23_NUDC_like<br>(195-240)   |  |                    |                                           |  |
| <i>Physcomitrella patens</i>     | Pp3c1_7900        | PHYPA_000356      | A0A2K1L7F1 | 7  | 362  | CS (199-289);<br>p23_NUDC_like<br>(204-289)   |  | cytoplasm          | unfolded protein binding, protein folding |  |
| <i>Marchantia polymorpha</i>     | MARPO_0037s0041   | MARPO_0037s0041   | A0A2R6X445 | 5  | 157  | CS (16-104);<br>p23_NUDC_like<br>(21-104)     |  | cytoplasm, nucleus | unfolded protein binding, protein folding |  |
| <i>Marchantia polymorpha</i>     | MARPO_0030s0062   | MARPO_0030s0062   | A0A2R6X894 | 6  | 348  | CS (186-275);<br>p23_NUDC_like<br>(191-275)   |  | cytoplasm          | unfolded protein binding, protein folding |  |
| <i>Klebsormidium nitens</i>      | KFL_003070120     | KFL_003070120     | A0A1Y1I6Z6 | 5  | 158  | CS (16-104)                                   |  | cytoplasm          | unfolded protein binding, protein folding |  |
| <i>Klebsormidium nitens</i>      | KFL_002820210     | KFL_002820210     | A0A1Y1I5U3 | 6  | 340  | CS (178-267)                                  |  | cytoplasm          | unfolded protein binding, protein folding |  |
| <i>Chlamydomonas reinhardtii</i> | CHLRE_08g369400v5 | CHLRE_08g369400v5 | A8J474     | 5  | 162  | CS (16-104);<br>p23_NUDC_like<br>(21-104)     |  | cytoplasm          | unfolded protein binding, protein folding |  |
| <i>Chlamydomonas reinhardtii</i> | CHLRE_13g590400v5 | CHLRE_13g590400v5 | A8IW64     | 7  | 317  | CS (165-263);<br>p23_NUDC_like<br>(170-263)   |  | cytoplasm          | unfolded protein binding, protein folding |  |
| <i>Chlamydomonas reinhardtii</i> | CHLRE_07g329600v5 | CHLRE_07g329600v5 | A0A2K3DJS4 | 10 | 1102 | CS (951-1033);<br>p23_NUDC_like<br>(951-1033) |  |                    |                                           |  |
| <i>Chlamydomonas reinhardtii</i> | CHLRE_17g711650v5 | CHLRE_17g711650v5 | A0A2K3CPM2 | 8  | 343  | CS (182-270);<br>p23_NUDC_like<br>(187-270)   |  | cytoplasm          |                                           |  |

*AtBOB1* homologs in other eukaryotic systems

| Organism                         | Locus ID (NCBI)             | Gene name           | Uniprot ID | Number of exons | Protein length (aa) | Protein domain & position             | Intracellular localization                                                                                                                    | Functions                                                                                                                                                                                                                                                                        | References                                                                                                                                                                                                                                                                                                                                                                            |
|----------------------------------|-----------------------------|---------------------|------------|-----------------|---------------------|---------------------------------------|-----------------------------------------------------------------------------------------------------------------------------------------------|----------------------------------------------------------------------------------------------------------------------------------------------------------------------------------------------------------------------------------------------------------------------------------|---------------------------------------------------------------------------------------------------------------------------------------------------------------------------------------------------------------------------------------------------------------------------------------------------------------------------------------------------------------------------------------|
| <i>Homo sapiens</i>              | 30535                       | <i>NUDCD2</i>       | Q8WVJ2     | 4               | 157                 | CS (14-104); p23_NUDC_like (12-104)   | cytoplasm, cytosol, intercellular bridge, kinetochore, microtubule cytoskeleton, microtubule organizing center, mitotic spindle, spindle pole | unfolded protein binding, protein folding                                                                                                                                                                                                                                        | Burkard et al. (2011); Scheuerle et al. (2023); Chen et al. (2020); Li et al. (2019)                                                                                                                                                                                                                                                                                                  |
| <i>Homo sapiens</i>              | 22208                       | <i>NUDCD3</i>       | Q8IVD9     | 6               | 361                 | CS (185-277); p23_NUDC_like (184-285) | cytoplasm, cytoplasm dynein complex                                                                                                           | unfolded protein binding, cilium assembly, protein folding, protein localization to pericentriolar material                                                                                                                                                                      | Rose et al. 2010; Cai et al. 2009; Zhou et al. 2006                                                                                                                                                                                                                                                                                                                                   |
| <i>Homo sapiens</i>              | 8045                        | <i>NUDC</i>         | Q9Y266     | 9               | 331                 | CS (167-258); p23_NUDC_like (172-258) | cytoplasm, cytosol, intercellular bridge, microtubule, midbody, mitotic spindle, nucleoplasm, spindle                                         | cadherin binding, unfolded protein binding, cell division, mitotic metaphase chromosome alignment, mitotic spindle organization, nuclear migration, protein folding, response to peptide hormone                                                                                 | Miller et al. (1999); Matsumoto and Ledbetter (1999); Zhou et al. (2003); Aumais et al. (2003); Chen et al. (2015); Biebl et al. (2022); Islam et al. (2020); Bagci et al. (2020); Weiderhold et al. (2016); Zhou et al. (2016); Gladwyn-Ng et al. (2016); De Souza et al. (2014); Chuang et al. (2013); Zhu et al. (2010); Pang et al. (2009); Tang et al. (2008); Lin et al. (2004) |
| <i>Mus musculus</i>              | <i>MGI</i> =1277103         | <i>Nudcd2</i>       | Q9CQ48     | 4               | 157                 | CS (19-91); p23_NUDC_like (12-104)    | cytoplasm, cytosol, intercellular bridge, kinetochore, microtubule cytoskeleton, microtubule organizing center, mitotic spindle, spindle pole | unfolded protein binding, protein folding                                                                                                                                                                                                                                        | Skarnes et al. (2011)                                                                                                                                                                                                                                                                                                                                                                 |
| <i>Mus musculus</i>              | <i>MGI</i> =2144158         | <i>Nudcd3</i>       | Q8R1N4     | 6               | 363                 | CS (187-279); p23_NUDC_like (186-287) | cytoplasm, cytoplasmic dynein complex                                                                                                         | cilium assembly, protein folding, protein localization to pericentriolar material                                                                                                                                                                                                | Yang et al. (2022)                                                                                                                                                                                                                                                                                                                                                                    |
| <i>Mus musculus</i>              | <i>MGI</i> =106014          | <i>Nudc</i>         | Q35685     | 8               | 332                 | CS (168-259); p23_NUDC_like (173-259) | cytoplasm, cytosol, microtubule, midbody, mitotic spindle, nucleus                                                                            | unfolded protein binding, cell division, mitotic metaphase chromosome alignment, mitotic spindle organization, nuclear migration, protein folding, response to peptide hormone                                                                                                   | Aumais et al. (2001); Yamada et al. (2010)                                                                                                                                                                                                                                                                                                                                            |
| <i>Rattus norvegicus</i>         | 1307203                     | <i>Nudcd2</i>       | Q5M823     | 5               | 157                 | CS (14-104); p23_NUDC_like (12-104)   | cytoplasm, cytosol, intercellular bridge, kinetochore, microtubule organizing center, mitotic spindle, spindle pole                           | unfolded protein binding, protein folding                                                                                                                                                                                                                                        |                                                                                                                                                                                                                                                                                                                                                                                       |
| <i>Rattus norvegicus</i>         | 6493297                     | <i>LOC100911422</i> | Q63525     | 8               | 332                 | CS (168-259); p23_NUDC_like (173-259) | cytoplasm, cytosol, microtubule, midbody, mitotic spindle, nucleus                                                                            | unfolded protein binding, cell division, mitotic metaphase chromosome alignment, mitotic spindle organization, nuclear migration, protein folding                                                                                                                                | Morris et al. (1997); Morris and Yu-Lee (1998)                                                                                                                                                                                                                                                                                                                                        |
| <i>Rattus norvegicus</i>         | 3215                        | <i>Nudc</i>         | A0A0G2K0V8 | 8               | 316                 | CS (152-243); p23_NUDC_like (157-243) | microtubule, midbody, spindle                                                                                                                 | cell cycle, cell division                                                                                                                                                                                                                                                        | Morris et al. (1997); Morris and Yu-Lee (1998)                                                                                                                                                                                                                                                                                                                                        |
| <i>Danio rerio</i>               | <i>ZDB-GENE-040801-49</i>   | <i>nudcd2</i>       | Q6DC89     | 4               | 157                 | CS (14-104); p23_NUDC_like (12-104)   | cytoplasm                                                                                                                                     | unfolded protein binding, protein folding                                                                                                                                                                                                                                        |                                                                                                                                                                                                                                                                                                                                                                                       |
| <i>Danio rerio</i>               | <i>ZDB-GENE-040426-2255</i> | <i>nudcd3</i>       | A0A0R4IY34 | 6               | 344                 | CS (168-260); p23_NUDC_like (167-268) |                                                                                                                                               |                                                                                                                                                                                                                                                                                  |                                                                                                                                                                                                                                                                                                                                                                                       |
| <i>Danio rerio</i>               | <i>ZDB-GENE-040426-899</i>  | <i>nudc</i>         | Q6NV13     | 9               | 333                 | CS (169-260); p23_NUDC_like (174-260) |                                                                                                                                               |                                                                                                                                                                                                                                                                                  |                                                                                                                                                                                                                                                                                                                                                                                       |
| <i>Drosophila melanogaster</i>   | <i>FBgn0051251</i>          | <i>DmelCG31251</i>  | Q8IN95     |                 | 306                 | CS (133-223)                          | cytoplasm, Golgi apparatus                                                                                                                    | unfolded protein binding, nuclear migration, protein folding                                                                                                                                                                                                                     | Miller et al. (2023); Wei et al. (2020); Hosono et al. (2015); Erives (2015); Cugusi et al. (2015); Neely et al. (2010); Schnorrer et al. (2010)                                                                                                                                                                                                                                      |
| <i>Drosophila melanogaster</i>   | <i>FBgn0021768</i>          | <i>nudC</i>         | Q9VVA6     | 6               | 332                 | CS (168-259); p23_NUDC_like (173-259) | cytoplasm, cytosol                                                                                                                            | unfolded protein binding, mRNA transport, nuclear migration, nucleus localization, positive regulation of dendrite morphogenesis, protein folding                                                                                                                                | Cunniff et al. (1997); Örkenby et al. (2023); Wainman et al. (2009)                                                                                                                                                                                                                                                                                                                   |
| <i>Caenorhabditis elegans</i>    | <i>WBGene00003829</i>       | <i>nud-1</i>        | G5EE74     | 2               | 320                 | CS (156-247); p23_NUDC_like (161-247) | cytoplasm, synapse                                                                                                                            | identical protein binding, unfolded protein binding, chaperone-mediated protein folding, embryo development ending in birth or egg hatching, locomotion, pronuclear migration, protein folding, synaptic transmission, GABAergic, synaptic vesicle transport, vulval development | Faircloth et al. (2009); Dawe et al. (2001)                                                                                                                                                                                                                                                                                                                                           |
| <i>Schizosaccharomyces pombe</i> | <i>SPBC19F8.02</i>          | <i>nud3</i>         | Q60166     | 1               | 166                 | CS (6-97); p23_NUDC_like (11-97)      | cytoplasm, microtubule, nucleus                                                                                                               | unfolded protein binding, cell division, mitotic sister chromatid segregation, protein folding, protein maturation                                                                                                                                                               |                                                                                                                                                                                                                                                                                                                                                                                       |
| <i>Dictyostelium discoideum</i>  | <i>DDB_G0286159</i>         | <i>nudc</i>         | Q54M64     | 2               | 171                 | CS (8-98); p23_NUDC_like (13-98)      | cytoplasm, microtubule                                                                                                                        | unfolded protein binding, cell cycle, cell division, karyogamy, protein folding                                                                                                                                                                                                  |                                                                                                                                                                                                                                                                                                                                                                                       |

## References

- Aumais, J.P.; Tunstead, J.R.; McNeil, R.S.; Schaar, B.T.; McConnell, S.K.; Lin, S.H.; Clark, G.D.; Yu-Lee, L.Y. NudC associates with Lis1 and the dynein motor at the leading pole of neurons. *J. Neurosci.* **2001**, *21*, RC187; DOI: 10.1523/JNEUROSCI.21-24-j0002.2001
- Aumais, J.P.; Williams, S.N.; Luo, W.; Nishino, M.; Caldwell, K.A.; Caldwell, G.A.; Lin, S.H.; Yu-Lee, L.Y. Role for NudC, a dynein-associated nuclear movement protein, in mitosis and cytokinesis. *J. Cell Sci.* **2003**, *116*, 1991-2003; DOI: 10.1242/jcs.00412
- Bagci, H.; Sriskandarajah, N.; Robert, A.; Boulais, J.; Elkholi, I.E.; Tran, V.; Lin, Z.Y.; Thibault, M.P.; Dubé, N.; Faubert, D.; Hipfner, D.R. Mapping the proximity interaction network of the Rho-family GTPases reveals signalling pathways and regulatory mechanisms. *Nat. Cell Biol.* **2020**, *22*, 120-134; DOI: 10.1038/s41556-019-0438-7
- Biebl, M.M.; Delhommel, F.; Faust, O.; Zak, K.M.; Agam, G.; Guo, X.; Mühlhofer, M.; Dahiya, V.; Hillebrand, D.; Popowicz, G.M.; Kampmann, M. NudC guides client transfer between the Hsp40/70 and Hsp90 chaperone systems. *Mol. Cell* **2022**, *82*, 555-569; DOI: 10.1016/j.molcel.2021.12.031
- Burkard, T.R.; Planyavsky, M.; Kaupe, I.; Breitwieser, F.P.; Bürckstümmer, T.; Bennett, K.L.; Superti-Furga, G.; Colinge, J. Initial characterization of the human central proteome. *BMC Syst. Biol.* **2011**, *5*, 1-13; DOI: 10.1186/1752-0509-5-17
- Cai, Y.; Yang, Y.; Shen, M.; Zhou, T. Inhibition of cytokinesis by overexpression of NudCL that is localized to the centrosome and midbody. *Cell Res.* **2009**, *19*, 1305-130; DOI: 10.1038/cr.2009.118
- Chen, D.; Ito, S.; Yuan, H.; Hyodo, T.; Kadomatsu, K.; Hamaguchi, M.; Senga, T. EML4 promotes the loading of NUDC to the spindle for mitotic progression. *Cell Cycle* **2015**, *14*, 1529-1539; DOI: 10.1080/15384101.2015.1026514
- Chen, W.; Wang, W.; Sun, X.; Xie, S.; Xu, X.; Liu, M.; Yang, C.; Li, M.; Zhang, W.; Liu, W.; Wang, L. NudCL2 regulates cell migration by stabilizing both myosin-9 and LIS1 with Hsp90. *Cell Death Dis.* **2020**, *11*, 534; DOI: 10.1038/s41419-020-02739-9
- Chuang, C.; Pan, J.; Hawke, D.H.; Lin, S.H.; Yu-Lee, L.Y. NudC deacetylation regulates mitotic progression. *PloS one* **2013**, *8*, e73841; DOI: 10.1371/journal.pone.0073841
- Cugusi, S.; Kallappagoudar, S.; Ling, H.; Lucchesi, J.C. The Drosophila Helicase Maleless (MLE) is Implicated in Functions Distinct From its Role in Dosage Compensation\*[S]. *Mol. Cell. Proteomics* **2015**, *14*, 1478-1488; DOI: 10.1074/mcp.M114.040667
- Cunniff, J.; Chiu, Y.H.; Morris, N.R.; Warrior, R. Characterization of DnudC, the Drosophila homolog of an Aspergillus gene that functions in nuclear motility. *Mech. Dev.* **1997**, *66*, 55-68; DOI: 10.1016/s0925-4773(97)00085-3
- Dawe, A.L.; Caldwell, K.A.; Harris, P.M.; Morris, R.N.; Caldwell, G.A. Evolutionarily conserved nuclear migration genes required for early embryonic development in Caenorhabditis elegans. *Dev. Genes Evol.* **2001**, *211*, 434-441; DOI: 10.1007/s004270100176
- De Souza, L.E.R.; Costa, M.D.M.; Bilek, E.S.; Lopes, M.H.; Martins, V.R.; Püschel, A.W.; Mercadante, A.F.; Nakao, L.S.; Zanata, S.M. STI1 antagonizes cytoskeleton collapse mediated by small GTPase Rnd1 and regulates neurite growth. *Exp. Cell Res.* **2014**, *324*, 84-91; DOI: 10.1016/j.yexcr.2014.03.017
- Erives, A.J. Genes conserved in bilaterians but jointly lost with Myc during nematode evolution are enriched in cell proliferation and cell migration functions. *Dev. Genes Evol.* **2015**, *225*, 259-273; DOI: 10.1007/s00427-015-0508-1
- Faircloth, L.M.; Churchill, P.F.; Caldwell, G.A.; Caldwell, K.A. The microtubule-associated protein, NUD-1, exhibits chaperone activity in vitro. *Cell Stress Chaperones* **2009**, *14*, 95-103; DOI: 10.1007/s12192-008-0061-1
- Gladwyn-Ng, I.; Huang, L.; Ngo, L.; Li, S.S.; Qu, Z.; Vanyai, H.K.; Cullen, H.D.; Davis, J.M.; Heng, J.I.T. Bacurd1/Kctd13 and Bacurd2/Tnfrsf1 are interacting partners to Rnd proteins which influence the long-term positioning and dendritic maturation of cerebral cortical neurons. *Neural Dev.* **2016**, *11*, 1-8; DOI: 10.1186/s13064-016-0062-1
- Gladwyn-Ng, I.E.; Li, S.S.; Qu, Z.; Davis, J.M.; Ngo, L.; Haas, M.; Singer, J.; Heng, J.I.T. Bacurd2 is a novel interacting partner to Rnd2 which controls radial migration within the developing mammalian cerebral cortex. *Neural Dev.* **2015**, *10*, 1-13; DOI: 10.1186/s13064-015-0032-z
- Hosono, C.; Matsuda, R.; Adryan, B.; Samakovlis, C. Transient junction anisotropies orient annular cell polarization in the Drosophila airway tubes. *Nat. Cell Biol.* **2015**, *17*, 1569-1576; DOI: 10.1038/ncb3267
- Islam, M.A.; Choi, H.J.; Dash, R.; Sharif, S.R.; Oktaviani, D.F.; Seog, D.H.; Moon, I.S. N-acetyl-D-Glucosamine kinase interacts with NudC and Lis1 in dynein motor complex and promotes cell migration. *Int. J. Mol. Sci.* **2020**, *22*, 129; DOI: 10.3390/ijms22010129
- Jurkuta, R.J.; Kaplinsky, N.J.; Spindel, J.E.; Barton, M.K. Partitioning the apical domain of the Arabidopsis embryo requires the BOBBER1 NudC domain protein. *Plant Cell* **2009**, *21*, 1957-1971; DOI: 10.1105/tpc.108.065284
- Kaplinsky, N.J. Temperature compensation of auxin dependent developmental patterning. *Plant Signal. Behav.* **2009**, *4*, 12, 1157-1158; DOI: 10.4161/psb.4.12.9949

- Li, M.; Xu, X.; Zhang, J.; Liu, M.; Wang, W.; Gao, Y.; Sun, Q.; Zhang, J.; Lu, Y.; Wang, F.; Liu, W. NudC-like protein 2 restrains centriole amplification by stabilizing HERC2. *Cell Death Dis.* **2019**, *10*, 628; DOI: 10.1038/s41419-019-1843-3
- Lin, S.H.; Nishino, M.; Luo, W.; Aumais, J.P.; Galfione, M.; Kuang, J.; Yu-Lee, L.Y. Inhibition of prostate tumor growth by overexpression of NudC, a microtubule motor-associated protein. *Oncogene* **2004**, *23*, 2499-2506; DOI: 10.1038/sj.onc.1207343
- Liu, S.; Wang, J.; Jiang, S.; Wang, H.; Gao, Y.; Zhang, H.; Li, D.; Song, F. Tomato SISAP3, a member of the stress-associated protein family, is a positive regulator of immunity against *Pseudomonas syringae* pv. *tomato* DC3000. *Mol. Plant Pathol.* **2019**, *20*, 6, 815-830; DOI: 10.1111/mpp.12793
- Matsumoto, N.; Ledbetter, D.H. Molecular cloning and characterization of the human NUDC gene. *Hum. Genet.* **1999**, *104*, 498-504; DOI: 10.1007/s004390050994
- Miller, B.A.; Zhang, M.Y.; Gocke, C.D.; De Souza, C.; Osmani, A.H.; Lynch, C.; Davies, J.; Bell, L.; Osmani, S.A. A homolog of the fungal nuclear migration gene nudC is involved in normal and malignant human hematopoiesis. *Exp. Hematol.* **1999**, *27*, 742-750; DOI: 10.1016/s0301-472x(98)00074-5
- Miller, D.E.; Dorador, A.P.; Van Vaerenbergh, K.; Li, A.; Grantham, E.K.; Cerbin, S.; Cummings, C.; Barragan, M.; Egidy, R.R.; Scott, A.R.; Hall, K.E. Off-target piRNA gene silencing in *Drosophila melanogaster* rescued by a transposable element insertion. *PLoS Genet.* **2023**, *19*, e1010598; DOI: 10.1371/journal.pgen.1010598
- Morris, S.M.; Anaya, P.; Xiang, X.; Morris, N.R.; May, G.S.; Yu-Lee, L.Y. A prolactin-inducible T cell gene product is structurally similar to the *Aspergillus nidulans* nuclear movement protein NUDC. *Mol. Endocrinol.* **1997**, *11*, 229-236; DOI: 10.1210/mend.11.2.9892
- Morris, S.M.; Yu-Lee, L.Y. Expression of RNUDC, a potential nuclear movement protein, in mammalian cells: localization to the Golgi apparatus. *Exp. Cell Res.* **1998**, *238*, 23-32; DOI: 10.1006/excr.1997.3822
- Neely, G.G.; Kuba, K.; Cammarato, A.; Isobe, K.; Amann, S.; Zhang, L.; Murata, M.; Elmén, L.; Gupta, V.; Arora, S.; Sarangi, R. A global in vivo *Drosophila* RNAi screen identifies NOT3 as a conserved regulator of heart function. *Cell* **2010**, *141*, 142-153; DOI: 10.1016/j.cell.2010.02.023
- Örkenby, L.; Skog, S.; Ekman, H.; Gozzo, A.; Kugelberg, U.; Ramesh, R.; Magadi, S.; Zambanini, G.; Nordin, A.; Cantú, C.; Nätt, D. Stress-sensitive dynamics of miRNAs and Elba1 in *Drosophila* embryogenesis. *Mol. Syst. Biol.* **2023**, *19*, e11148; DOI: 10.15252/msb.202211148
- Pang, S.F.; Li, X.K.; Zhang, Q.; Yang, F.; Xu, P. Interference RNA (RNAi)-based silencing of endogenous thrombopoietin receptor (Mpl) in Dami cells resulted in decreased hNUDC-mediated megakaryocyte proliferation and differentiation. *Exp. Cell Res.* **2009**, *315*, 3563-3573; DOI: 10.1016/j.yexcr.2009.06.020
- Perez, D.E.; Hoyer, J.S.; Johnson, A.I.; Moody, Z.R.; Lopez, J.; Kaplinsky, N.J. BOBBER1 is a noncanonical Arabidopsis small heat shock protein required for both development and thermotolerance. *Plant Physiol.* **2009**, *151*, 241-252; DOI: 10.1104/pp.109.142125
- Rose, J.E.; Behm, F.M.; Drgon, T.; Johnson, C.; Uhl, G.R. Personalized smoking cessation: interactions between nicotine dose, dependence and quit-success genotype score. *Mol. Med.* **2010**, *16*, 247-253; DOI: 10.2119/molmed.2009.00159
- Scheuerle, A.E.; Ni, M.; Ahmad, A.A.; Timmons, C.F.; Rakheja, D.; Gordon, E.E.; Boothe, M. Biallelic variants in NUDCD2 associated with a multiple malformation syndrome with cholestasis and renal failure. *Am. J. Med. Genet. A* **2023**, *191*, 2324-2328; DOI: 10.1002/ajmg.a.63314
- Schnorrer, F.; Schönbauer, C.; Langer, C.C.; Dietzl, G.; Novatchkova, M.; Schernhuber, K.; Fellner, M.; Azaryan, A.; Radolf, M.; Stark, A.; Keleman, K. Systematic genetic analysis of muscle morphogenesis and function in *Drosophila*. *Nature* **2010**, *464*, 287-291; DOI: 10.1038/nature08799
- Skarnes, W.C.; Rosen, B.; West, A.P.; Koutsourakis, M.; Bushell, W.; Iyer, V.; Mujica, A.O.; Thomas, M.; Harrow, J.; Cox, T.; Jackson, D. A conditional knockout resource for the genome-wide study of mouse gene function. *Nature* **2011**, *474*, 337-342; DOI: 10.1038/nature10163
- Tang, Y.S.; Zhang, Y.P.; Xu, P. hNUDC promotes the cell proliferation and differentiation in a leukemic cell line via activation of the thrombopoietin receptor (Mpl). *Leukemia* **2008**, *22*, 1018-1025; DOI: 10.1038/leu.2008.20
- Velinov, V.; Vaseva, I.; Zehirov, G.; Zhiponova, M.; Georgieva, M.; Vangheluwe, N.; Beeckman, T.; Vassileva, V. Overexpression of the NMig1 gene encoding a NudC domain protein enhances root growth and abiotic stress tolerance in *Arabidopsis thaliana*. *Front. Plant Sci.* **2020**, *11*, 815; DOI: 10.3389/fpls.2020.00815
- Velinov, V.; Georgieva, M.; Zehirov, G.; Vassileva, V. NudC-like genes contribute to root growth and branching in *Arabidopsis thaliana*. *C. R. Acad. Bulg. Sci.* **2021**, *74*, 12, 1767-1773; DOI: 10.7546/CRABS.2021.12.06
- Wainman, A.; Creque, J.; Williams, B.; Williams, E.V.; Bonaccorsi, S.; Gatti, M.; Goldberg, M.L. Roles of the *Drosophila* NudE protein in kinetochore function and centrosome migration. *J. Cell Sci.* **2009**, *122*, 1747-1758; DOI: 10.1242/jcs.041798
- Wei, P.; Xue, W.; Zhao, Y.; Ning, G.; Wang, J. CRISPR-based modular assembly of a UAS-cDNA/ORF plasmid library for more than 5500 *Drosophila* genes conserved in humans. *Genome Res.* **2020**, *30*, 95-106; DOI: 10.1101/gr.250811.119

- Weiderhold, K.N.; Fadri-Moskwik, M.; Pan, J.; Nishino, M.; Chuang, C.; Deeraksa, A.; Lin, S.H.; Yu-Lee, L.Y. Dynamic phosphorylation of NudC by Aurora B in cytokinesis. *PLoS One* **2016**, *11*, e0153455; DOI: 10.1371/journal.pone.0153455
- Yamada, M.; Toba, S.; Takitoh, T.; Yoshida, Y.; Mori, D.; Nakamura, T.; Iwane, A.H.; Yanagida, T.; Imai, H.; Yu-Lee, L.Y.; Schroer, T. mNUDC is required for plus-end-directed transport of cytoplasmic dynein and dynactins by kinesin-1. *Embo J* **2010**, *29*, 517-531; DOI: 10.1038/emboj.2009.378
- Yang, J.; Zhang, L.; Li, Y.; Chen, M. Identifying key m6A-methylated lncRNAs and genes associated with neural tube defects via integrative MeRIP and RNA sequencing analyses. *Front. Genet.* **2022**, *13*, 974357; DOI: 10.3389/fgene.2022.974357
- Zhou, L.; Di, Q.; Sun, B.; Wang, X.; Li, M.; Shi, J. MicroRNA-194 restrains the cell progression of non-small cell lung cancer by targeting human nuclear distribution protein C. *Oncol. Rep.* **2016**, *35*, 3435-3444; DOI: 10.3892/or.2016.4708
- Zhou, T.; Aumais, J.P.; Liu, X.; Yu-Lee, L.Y.; Erikson, R.L. A role for Plk1 phosphorylation of NudC in cytokinesis. *Dev. Cell* **2003**, *5*, 127-138; DOI: 10.1016/s1534-5807(03)00186-2
- Zhou, T.; Zimmerman, W.; Liu, X.; Erikson, R.L. A mammalian NudC-like protein essential for dynein stability and cell viability. *Proc. Natl. Acad. Sci. U. S. A.* **2006**, *103*, 9039-9044; DOI: 10.1073/pnas.0602916103
- Zhu, X.J.; Liu, X.; Jin, Q.; Cai, Y.; Yang, Y.; Zhou, T. The L279P mutation of nuclear distribution gene C (NudC) influences its chaperone activity and lissencephaly protein 1 (LIS1) stability. *J. Biol. Chem.* **2010**, *285*, 29903-29910; DOI: 10.1074/jbc.M110.105494
